# Supplementary material for: Rational molecular design of phenanthroimidazole–azine derivatives for efficient non-doped blue organic light-emitting diodes with low-efficiency roll-off
Source: Royal Society of Chemistry journal article supplement (doi:10.1039/d3tc02638h), 2023-01-01

## Supporting Information

### Rational molecular design of phenanthroimidazole-azine derivatives for efficient non-doped blue organic light-emitting diodes with low-efficiency roll-off

Pongsakorn Chasing,<sup>1</sup> Jakkapan Kumsampao,<sup>1</sup> Pattarapapa Janthakit,<sup>1</sup> Phattananawee Nalaoh,<sup>1</sup> Thidarat Loythaworn,<sup>1</sup> Wijitra Waengdongbung,<sup>1</sup> Praweena Wongkaew,<sup>1</sup> Taweesak Sudyoasuk<sup>2</sup> and Vinich Promarak\*<sup>1</sup>

<sup>1</sup> Department of Materials Science and Engineering, School of Molecular Science and Engineering, Vidyasirimedhi Institute of Science and Technology, Wangchan, Rayong 21210, Thailand. E-mail: vinich.p@vistec.ac.th

<sup>2</sup> Frontier Research Center (FRC), Vidyasirimedhi Institute of Science and Technology, Wangchan, Rayong 21210, Thailand.

---

#### Synthesis and characterization

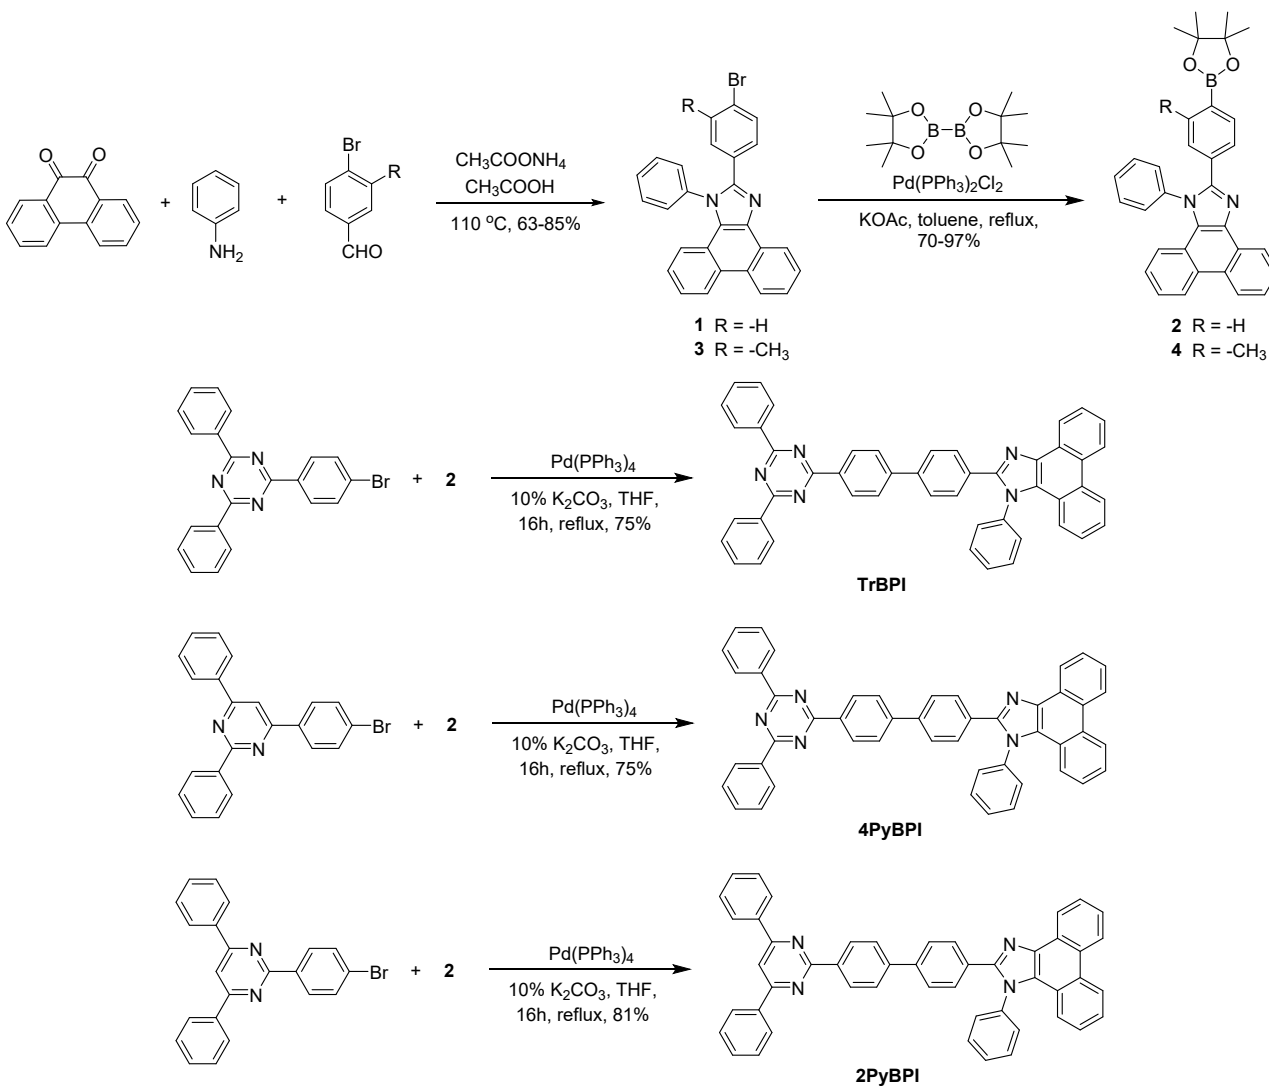

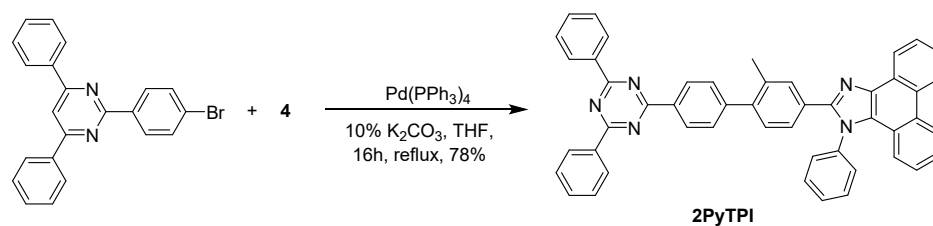

**Scheme 1** Synthesis pathway

### 2-(4-Bromophenyl)-1-phenyl-1H-phenanthro[9,10-d]imidazole (**1**)

A mixture of phenanthrene-9,10-dione (2.00 g, 9.60 mmol), aniline (1.30 ml, 14.40 mmol), 4-bromobenzaldehyde (1.78 g, 9.60 mmol), ammonium acetate (3.70 g 48.02 mmol), and acetic acid (50 mL) was refluxed at 110°C for 12 h. The mixture was cooled to room temperature and then poured into ice cold water. The solid product was separated by filtration and washed with water. The crude solid was dissolved in DCM and washed with water and brine, dried over anhydrous Na<sub>2</sub>SO<sub>4</sub> and removed organic solvent, respectively. The crude product was purified by recrystallization from DCM/MeOH mixture solvent to give white solids (2.71 g, 63%). <sup>1</sup>H NMR (600 MHz, CDCl<sub>3</sub>) δ 8.85 (d, *J* = 7.9 Hz, 1H), 8.76 (d, *J* = 8.3 Hz, 1H), 8.70 (d, *J* = 8.3 Hz, 1H), 7.74 (t, *J* = 7.5 Hz, 1H), 7.69 – 7.58 (m, 4H), 7.55 – 7.48 (m, 3H), 7.44 (q, *J* = 8.5 Hz, 4H), 7.26 (t, *J* = 7.6 Hz, 1H), 7.17 (d, *J* = 8.3 Hz, 1H). <sup>13</sup>C NMR (151 MHz, CDCl<sub>3</sub>) δ 149.72, 138.58, 137.47, 131.44, 130.80, 130.30, 129.99, 129.50, 129.37, 129.03, 128.32, 128.30, 127.35, 127.13, 126.32, 125.73, 125.04, 124.14, 123.35, 123.14, 122.95, 122.70, 120.84. HRMS APCI/Q-TOF (*m/z*): calcd for C<sub>27</sub>H<sub>17</sub>BrN<sub>2</sub> 448.0575, found 448.6108 [M<sup>+</sup>].

### 1-Phenyl-2-(4-(4,4,5,5-tetramethyl-1,3,2-dioxaborolan-2-yl)phenyl)-1H-phenanthro[9,10-d]imidazole (**2**)

Compound **1** (1.0 g, 2.2 mmol), bispinacolatodiboron (1.7 g, 6.7 mmol) and potassium acetate (2.7 g, 27.0 mmol) were suspended in dried toluene (60 ml) under nitrogen atmosphere. Bis(triphenylphosphine)palladium(II) dichloride (Pd(PPh<sub>3</sub>)<sub>2</sub>Cl<sub>2</sub>) (78 mg, 0.1 mmol) was added and degassed for 15 minutes. The reaction mixture was stirred for 16 hours under reflux, cooled to room temperature. The resulting mixture was filtered through Celite pad, washed by dichloromethane (250 ml) and concentrated *in vacuo*. The product was purified by recrystallization from dichloromethane and hexane to give grey solids (0.77 g, 70%). <sup>1</sup>H NMR (600 MHz, CDCl<sub>3</sub>) δ 8.90 (d, *J* = 8.0 Hz, 1H), 8.77 (d, *J* = 8.3 Hz, 1H), 8.70 (d, *J* = 8.3 Hz, 1H), 7.77 – 7.69 (m, 3H), 7.67 – 7.64 (m, *J* = 8.4, 7.0, 1.4 Hz, 1H), 7.63 – 7.56 (m, 5H), 7.53 – 7.48 (m, 3H), 7.28 – 7.24 (m, 1H), 7.18 (d, *J* = 8.0 Hz, 1H), 1.34 (s, 12H); <sup>13</sup>C NMR (151 MHz, CDCl<sub>3</sub>) δ 134.7, 130.5, 129.2, 128.9, 128.7, 126.7, 124.3, 123.1, 121.0, 84.1, 24.9. HRMS APCI/Q-TOF (*m/z*): calcd for C<sub>33</sub>H<sub>29</sub>BN<sub>2</sub>O<sub>2</sub> 497.2396; found: 497.1836 [M<sup>+</sup>].

### 2-(4-Bromo-3-methylphenyl)-1-phenyl-1H-phenanthro[9,10-d]imidazole (**3**)

Phenanthrenequinone (1.0 g, 4.8 mmol), 4-bromo-3-methylbenzaldehyde (0.96 g, 4.8 mmol) were dissolved in acetic acid (25 ml), stirred at room temperature. Aniline (0.66 ml, 7.2 mmol) was added as dropwise and ammonium acetate (1.85 g, 24.0 mmol) was then added to reaction mixture, followed with heat to 110°C for 12 hours. After completion reaction was allowed to room temperature and pour into ice bath. The crude solid was filtered and washed with water. Filtered solid was dissolved in dichloromethane, washed with water (4 x 30 ml), dried (Na<sub>2</sub>SO<sub>4</sub>) and concentrated *in vacuo*. The product was purified by recrystallization in dichloromethane/methanol to give grey solids (1.89 g, 85%). <sup>1</sup>H NMR (600 MHz, CDCl<sub>3</sub>) δ 8.85 (d, *J* = 7.2 Hz, 1H), 8.76 (d, *J* = 8.3 Hz, 1H), 8.70 (d, *J* = 8.3 Hz, 1H), 7.74 (t, *J* = 7.4 Hz, 1H), 7.67 – 7.58 (m, 5H),

7.50 (m, 3H), 7.38 (d,  $J = 8.3$  Hz, 1H), 7.27 – 7.22 (m, 1H), 7.18 (dd,  $J = 8.4, 1.2$  Hz, 1H), 7.08 (dd,  $J = 8.3, 2.3$  Hz, 1H), 2.34 (s, 3H);  $^{13}\text{C}$  NMR (151 MHz,  $\text{CDCl}_3$ )  $\delta$  145.8, 138.5, 136.9, 134.3, 131.3, 131.2, 131.1, 130.5, 130.3, 129.5, 129.2, 128.5, 128.4, 128.2, 128.1, 127.4, 126.7, 122.6. HRMS APCI/Q-TOF ( $m/z$ ): calcd for  $\text{C}_{28}\text{H}_{19}\text{BrN}_2$  463.3780; found: 463.0142 [ $\text{M}$ ] $^+$ .

*2-(3-Methyl-4-(4,4,5,5-tetramethyl-1,3,2-dioxaborolan-2-yl)phenyl)-1-phenyl-1H-phenanthro[9,10-d]imidazole (4)*

Compound **3** (1.0 g, 2.2 mmol), bispinacolatodiboron (1.6 g, 6.5 mmol) and potassium acetate (2.7 g, 27.0 mmol) were suspended in dried toluene (50 ml) under nitrogen atmosphere. Bis(triphenylphosphine)palladium(II) dichloride ( $\text{Pd}(\text{PPh}_3)_2\text{Cl}_2$ ) (76 mg, 0.1 mmol) was added and degassed for 15 minutes. The reaction mixture was stirred for 16 hours under reflux, cooled to room temperature. The resulting mixture was filtered through Celite pad, washed by dichloromethane (250 ml) and concentrated *in vacuo*. The product was purified by column chromatography on silica gel eluting with hexane:dichloromethane (3:2) to give white solids (1.10 g, 97%).  $^1\text{H}$  NMR (600 MHz,  $\text{CDCl}_3$ )  $\delta$  8.89 (dd,  $J = 8.0, 1.4$  Hz, 1H), 8.77 (dd,  $J = 8.5, 1.3$  Hz, 1H), 8.70 (dd,  $J = 8.1, 1.1$  Hz, 1H), 7.74 (td,  $J = 8.0, 1.1$  Hz, 1H), 7.67 - 7.57 (m, 6H), 7.53 - 7.48 (m, 3H), 7.28 - 7.24 (m, 1H), 7.20 - 7.17 (m, 2H), 2.49 (s, 3H), 1.34 (s, 12H);  $^{13}\text{C}$  NMR (151 MHz,  $\text{CDCl}_3$ )  $\delta$  150.9, 144.8, 138.9, 137.5, 135.8, 132.4, 130.8, 130.1, 129.7, 129.3, 129.1, 128.3, 128.2, 127.3, 127.3, 126.2, 125.6, 125.2, 124.8, 124.1, 123.1, 122.8, 120.9, 83.6, 24.9, 22.2. HRMS APCI/Q-TOF ( $m/z$ ): calcd for  $\text{C}_{34}\text{H}_{31}\text{BN}_2\text{O}_2$  511.2512; found: 511.2681 [ $\text{M}^+$ ].

### Single-crystal X-ray diffraction

**Table S1.** Crystallographic data of **TrBPI**, **2PyBPI** and **2PyTPI**

| compound                                  | TrBPI                                  | 2PyBPI                                 | 2PyTPI                                 |
|-------------------------------------------|----------------------------------------|----------------------------------------|----------------------------------------|
| CCDC deposition number                    | 2281463                                | 2059962                                | 2281464                                |
| Empirical formula                         | $\text{C}_{48}\text{H}_{31}\text{N}_5$ | $\text{C}_{49}\text{H}_{32}\text{N}_4$ | $\text{C}_{50}\text{H}_{34}\text{N}_4$ |
| Formula weight                            | 677.78                                 | 676.78                                 | 690.81                                 |
| Temperature/K                             | 100.00                                 | 100.0                                  | 100.00                                 |
| Crystal system                            | triclinic                              | monoclinic                             | monoclinic                             |
| Space group                               | P-1                                    | $\text{P}2_1/\text{c}$                 | $\text{P}2_1/\text{n}$                 |
| a/Å                                       | 8.8289(10)                             | 8.8710(8)                              | 15.5261(12)                            |
| b/Å                                       | 9.4225(10)                             | 41.168(4)                              | 11.0720(9)                             |
| c/Å                                       | 21.063(2)                              | 9.5464(8)                              | 23.3012(18)                            |
| $\alpha/^\circ$                           | 80.889(4)                              | 90                                     | 90                                     |
| $\beta/^\circ$                            | 83.911(4)                              | 101.567(3)                             | 100.221(3)                             |
| $\gamma/^\circ$                           | 78.595(4)                              | 90                                     | 90                                     |
| Volume/Å <sup>3</sup>                     | 1690.9(3)                              | 3415.6(5)                              | 3942.0(5)                              |
| Z                                         | 2                                      | 4                                      | 4                                      |
| $\rho_{\text{calc}}/\text{g}/\text{cm}^3$ | 1.331                                  | 1.316                                  | 1.164                                  |
| $\mu/\text{mm}^{-1}$                      | 0.079                                  | 0.078                                  | 0.068                                  |
| F(000)                                    | 708.0                                  | 1416.0                                 | 1448.0                                 |

|                                                  |                                                                              |                                                                              |                                                                              |
|--------------------------------------------------|------------------------------------------------------------------------------|------------------------------------------------------------------------------|------------------------------------------------------------------------------|
| Crystal size/mm <sup>3</sup>                     | 0.28 × 0.14 × 0.08                                                           | 0.253 × 0.214 × 0.134                                                        | 0.274 × 0.26 × 0.02                                                          |
| Radiation                                        | MoK $\alpha$ ( $\lambda$ = 0.71073)                                          | MoK $\alpha$ ( $\lambda$ = 0.71073)                                          | MoK $\alpha$ ( $\lambda$ = 0.71073)                                          |
| 2 $\Theta$ range for data collection/ $^{\circ}$ | 3.928 to 52.776                                                              | 4.466 to 55.754                                                              | 3.552 to 50.146                                                              |
| Index ranges                                     | -11 $\leq$ h $\leq$ 11,<br>-11 $\leq$ k $\leq$ 11,<br>-26 $\leq$ l $\leq$ 26 | -11 $\leq$ h $\leq$ 11,<br>-54 $\leq$ k $\leq$ 54,<br>-10 $\leq$ l $\leq$ 12 | -18 $\leq$ h $\leq$ 18,<br>-13 $\leq$ k $\leq$ 13,<br>-27 $\leq$ l $\leq$ 27 |
| Reflections collected                            | 61351                                                                        | 52950                                                                        | 238086                                                                       |
| Independent reflections                          | 6905 [ $R_{\text{int}}$ = 0.0384,<br>$R_{\text{sigma}}$ = 0.0223]            | 8161 [ $R_{\text{int}}$ = 0.0611,<br>$R_{\text{sigma}}$ = 0.0488]            | 6990 [ $R_{\text{int}}$ = 0.1058,<br>$R_{\text{sigma}}$ = 0.0239]            |
| Data/restraints/parameters                       | 6905/0/478                                                                   | 8161/0/479                                                                   | 6990/0/488                                                                   |
| Goodness-of-fit on $F^2$                         | 1.054                                                                        | 1.027                                                                        | 1.113                                                                        |
| Final R indexes [ $I \geq 2\sigma(I)$ ]          | $R_1$ = 0.0388,<br>$wR_2$ = 0.0952                                           | $R_1$ = 0.0494,<br>$wR_2$ = 0.1076                                           | $R_1$ = 0.0616,<br>$wR_2$ = 0.1245                                           |
| Final R indexes [all data]                       | $R_1$ = 0.0454,<br>$wR_2$ = 0.1042                                           | $R_1$ = 0.0731,<br>$wR_2$ = 0.1172                                           | $R_1$ = 0.0986,<br>$wR_2$ = 0.1619                                           |
| Largest diff. peak/hole / e $\text{\AA}^{-3}$    | 0.26/-0.27                                                                   | 0.33/-0.29                                                                   | 0.41/-0.38                                                                   |

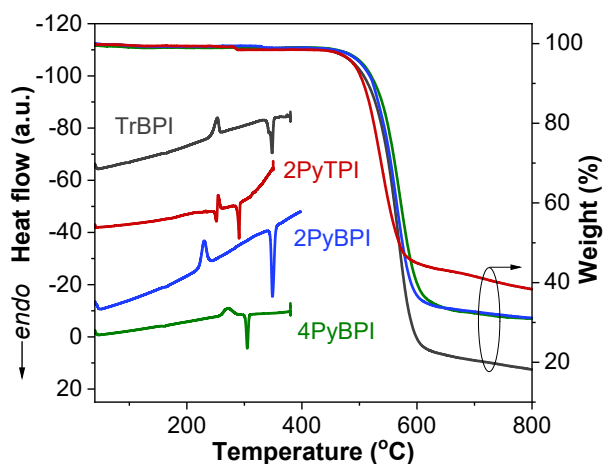

**Fig. S1** DSC (2<sup>nd</sup> scan) and TGA thermograms measured at a heating rate of 10 °C/min under N<sub>2</sub> flow.

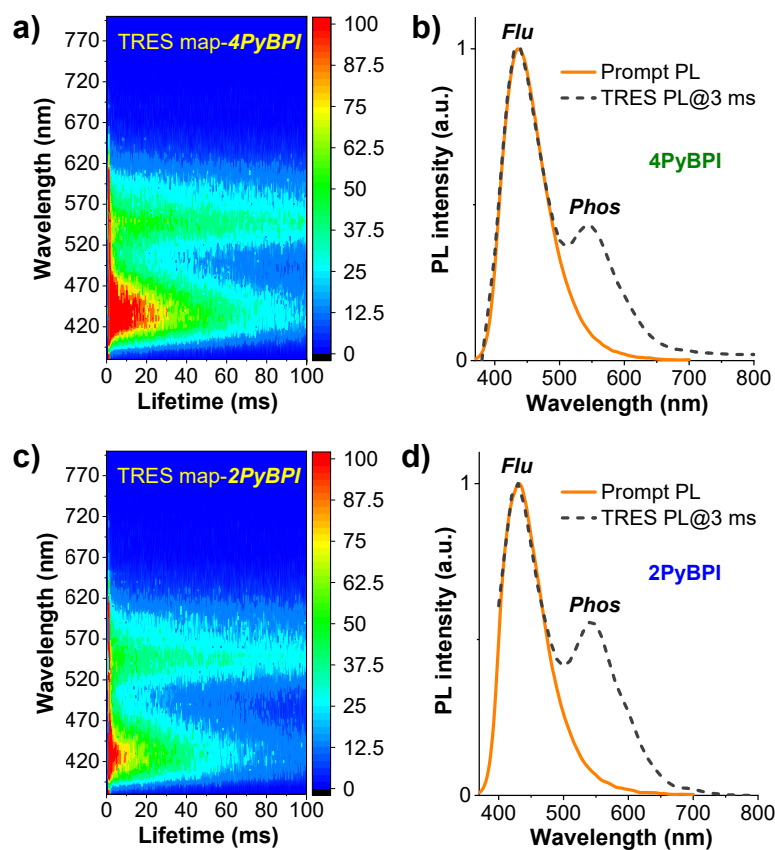

**Fig. S2** a), c) TRES maps and b), d) integrated TRES slices of prompt PL and TRES PL @3 ms spectra of the neat films and 2wt% doped poly(4-bromostyrene) films covered by EXCEVAL™ film coated on fused silica substrate

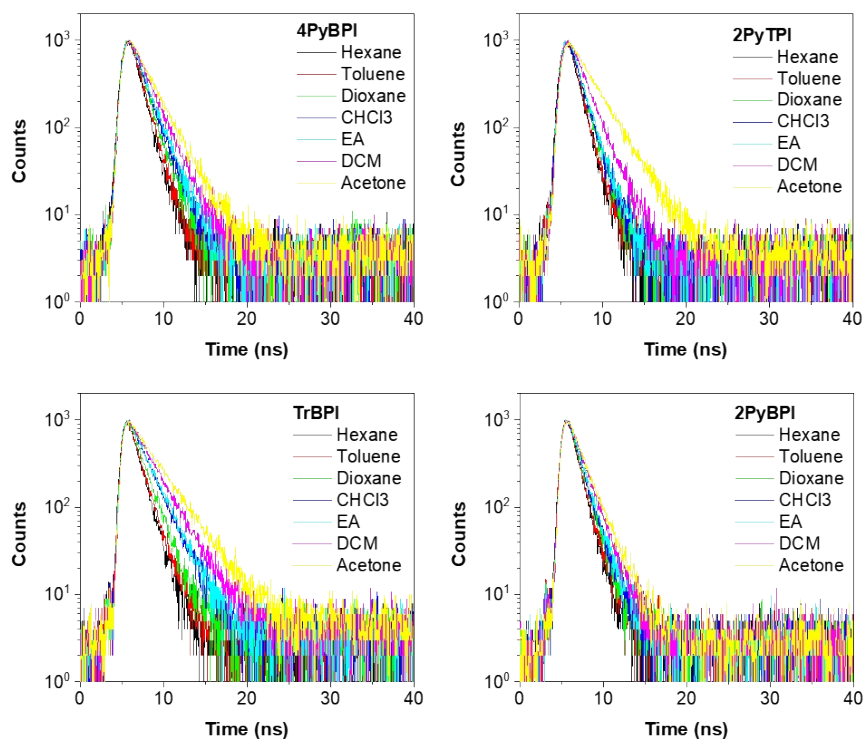

**Fig. S3** Transient PL decay spectra in different solvents.

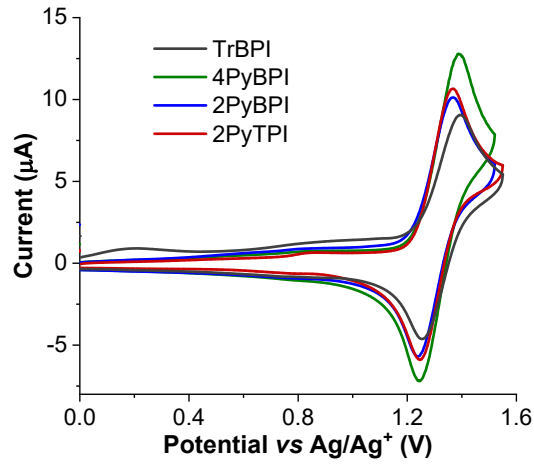

**Fig. S4** Cyclic voltammograms measured in  $\text{CH}_2\text{Cl}_2$  containing  $n\text{-Bu}_4\text{NPF}_6$  at a scan rate of 50 mV/s under Ar atmosphere.

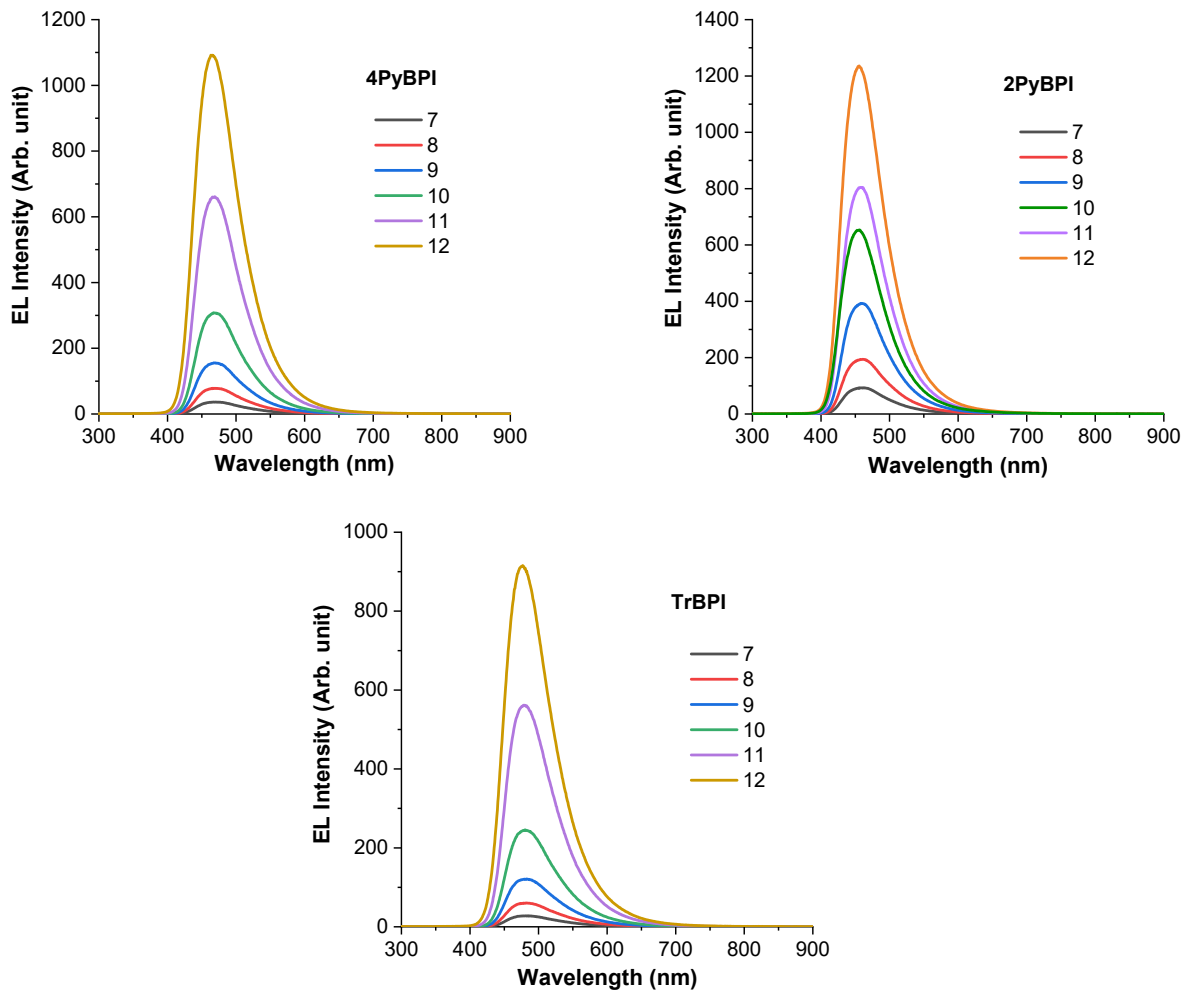

**Fig. S5** EL spectra at different applied voltages.

Fig. S6 Copies of  $^1\text{H}$ -NMR (600 MHz,  $\text{CDCl}_3$ ),  $^{13}\text{C}$ -NMR (151 MHz,  $\text{CDCl}_3$ ) and HRMS mass spectra.

Compound 1

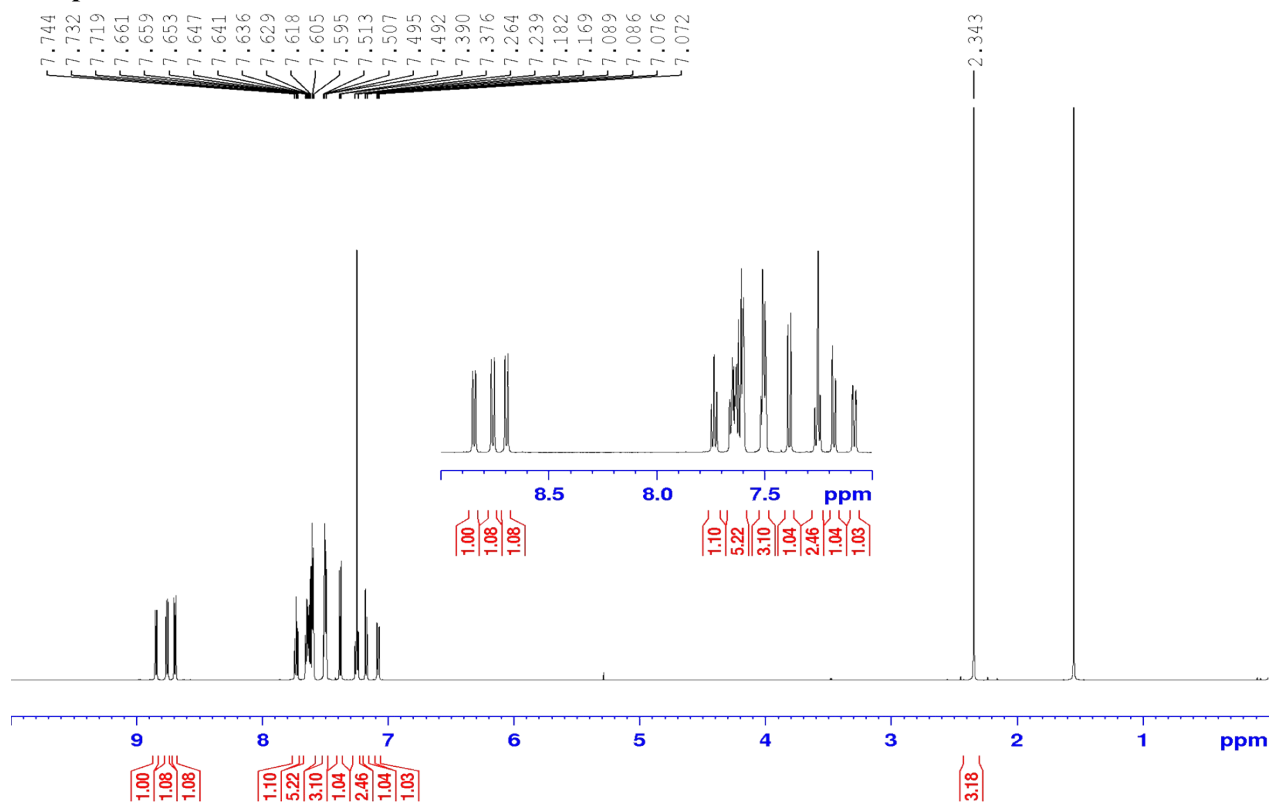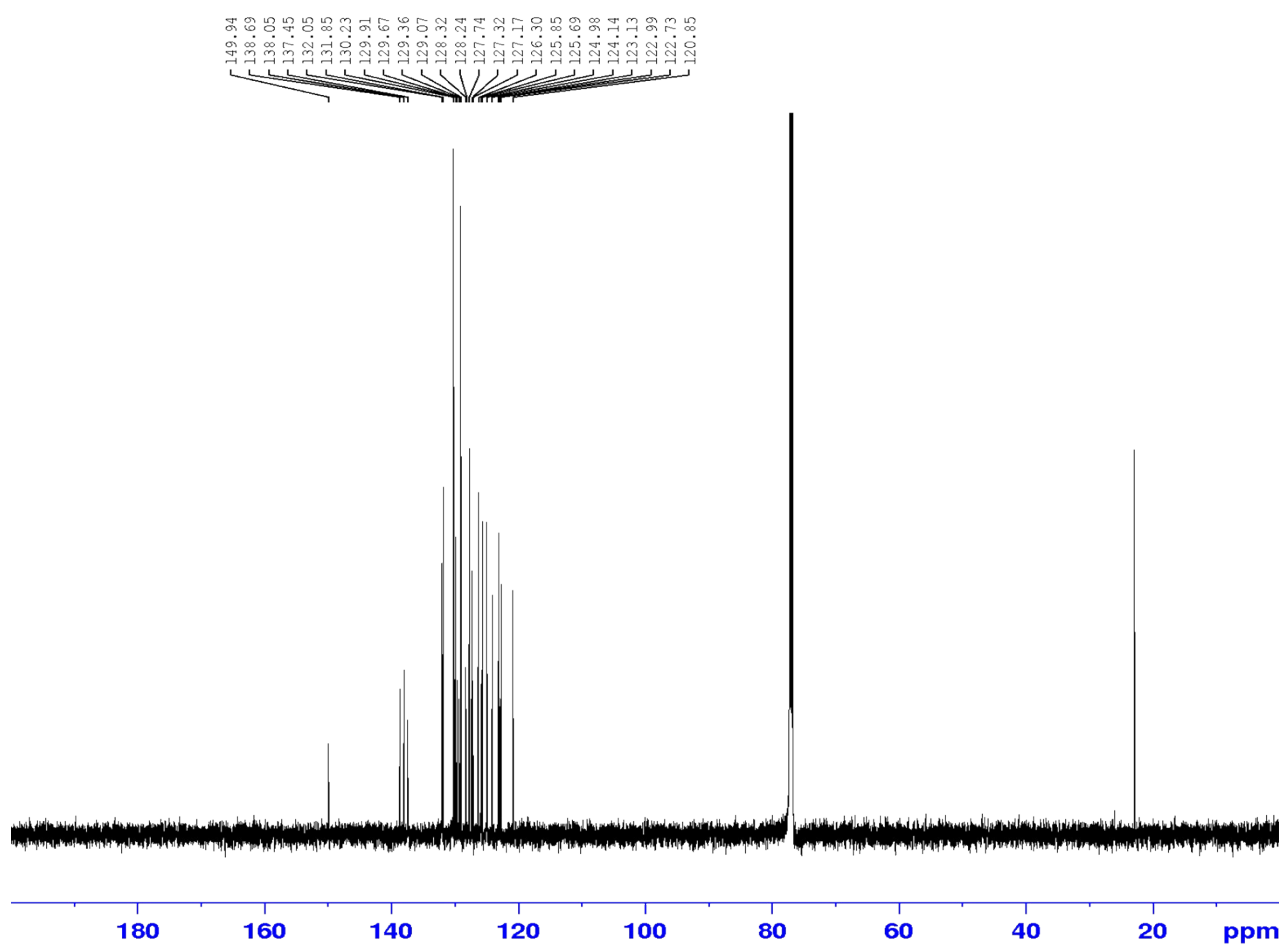

# Compound 2

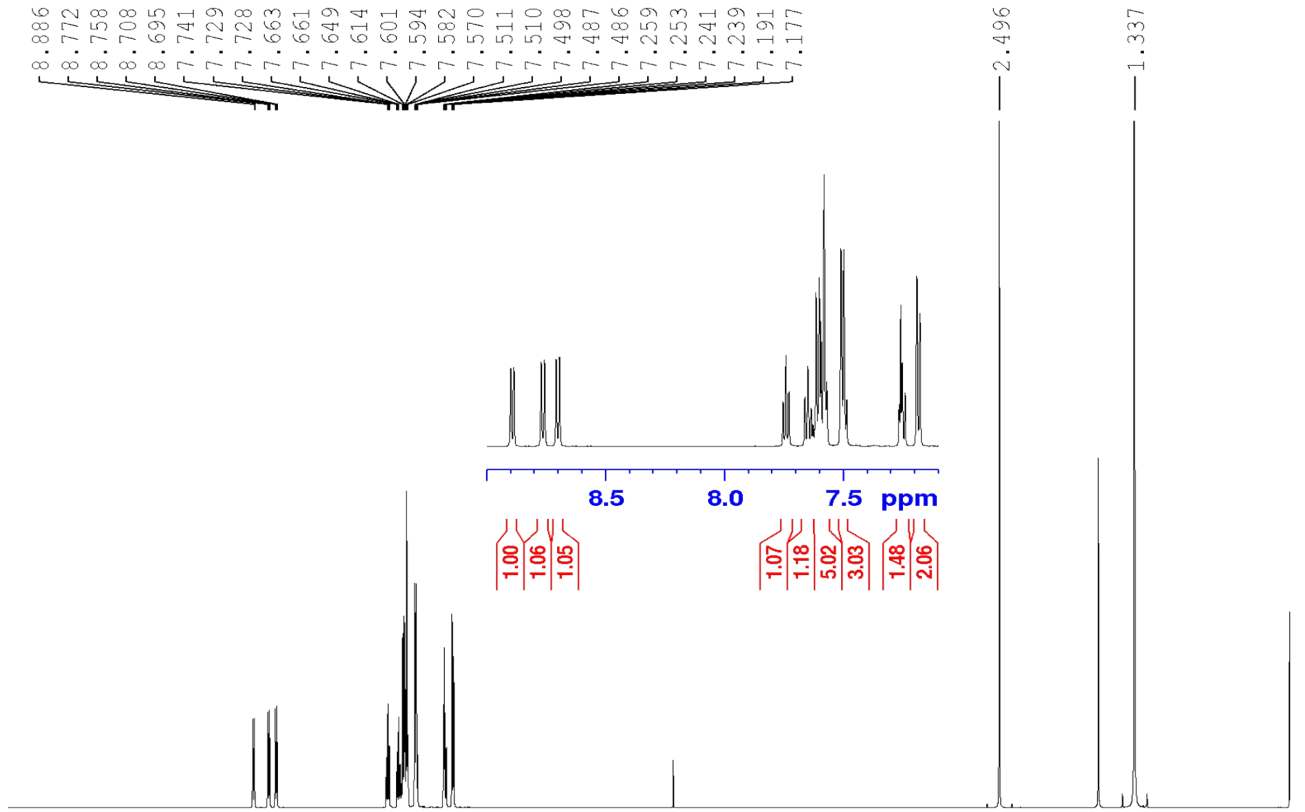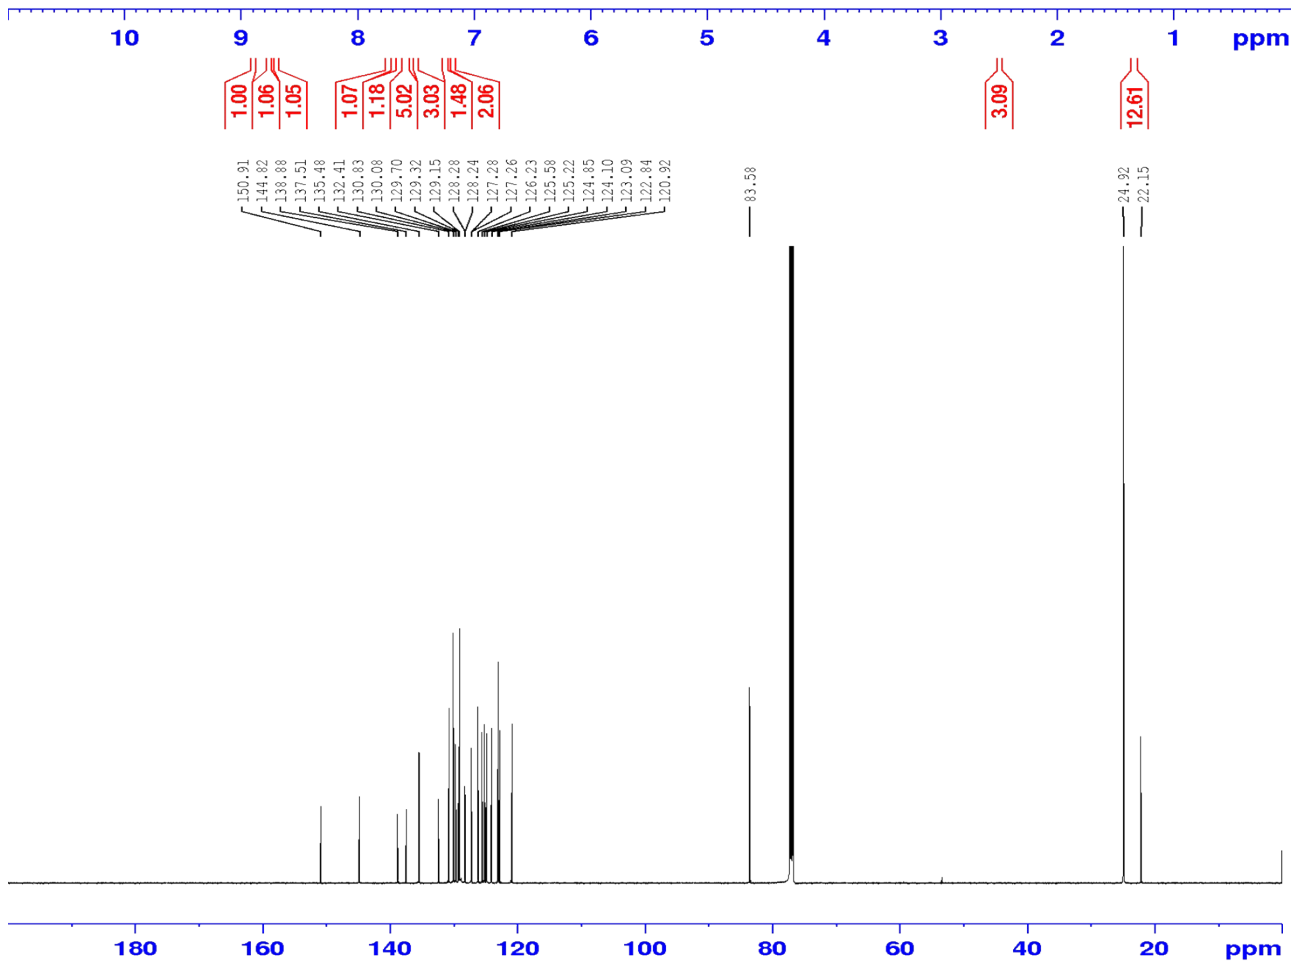



# Compound 3

AW03-71-1st-RC1  
 CP\_PROTON8 CDC13 {D:\VISTEC NMR Data\VP} vpprw 15

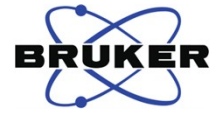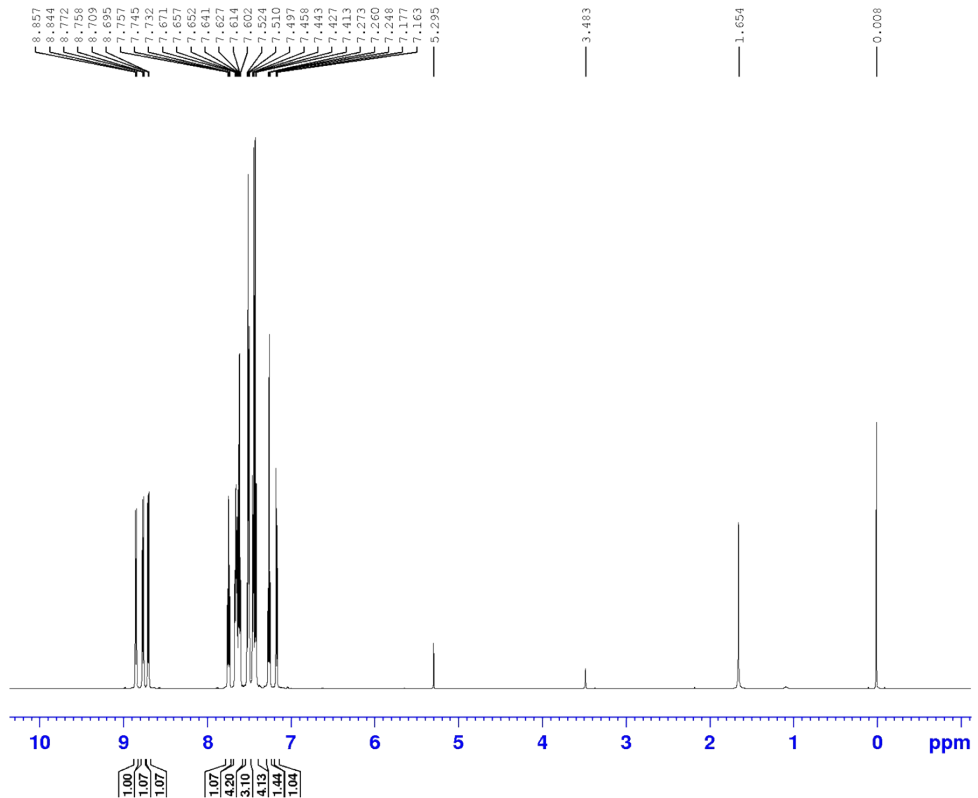

Current Data Parameters  
 NAME AW03-71-1st-RC1  
 EXPNO 1  
 PROCNO 1

F2 - Acquisition Parameters  
 Date\_ 20210401  
 Time 9.53 h  
 INSTRUM spect  
 PROBHD Z115435\_0005 (  
 PULPROG zg30  
 TD 65536  
 SOLVENT CDC13  
 NS 8  
 DS 2  
 SWH 12019.230 Hz  
 FIDRES 0.366798 Hz  
 AQ 2.7262976 sec  
 RG 116.94  
 DW 41.600 usec  
 DE 40.00 usec  
 TE 300.1 K  
 D1 1.00000000 sec  
 TD0 1  
 SFO1 600.1337058 MHz  
 NUC1 1H  
 P0 3.32 usec  
 P1 9.95 usec  
 PLW1 18.00000000 W

F2 - Processing parameters  
 SI 65536  
 SF 600.1300144 MHz  
 WDW EM  
 SSB 0  
 LB 0.30 Hz  
 GB 0  
 PC 1.00

AW03-71-1st-RC1-512  
 CP\_C13CPD CDC13 {D:\VISTEC NMR Data\VP} vpprw 15

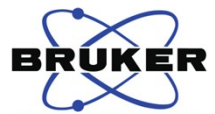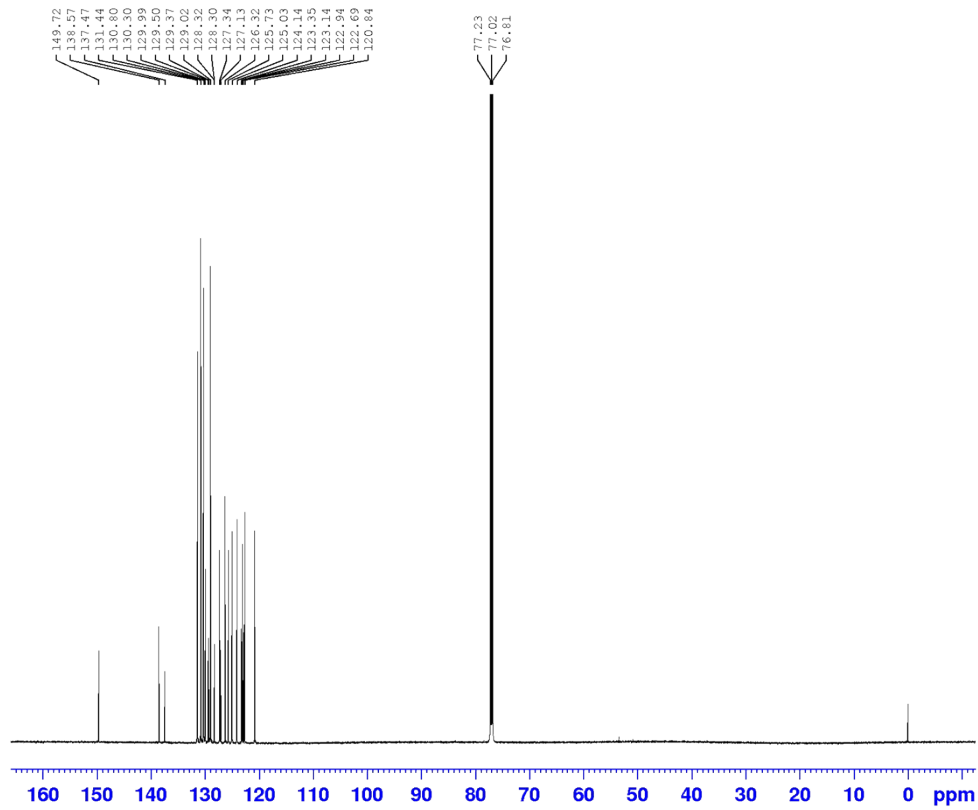

Current Data Parameters  
 NAME AW03-71-1st-RC1  
 EXPNO 2  
 PROCNO 1

F2 - Acquisition Parameters  
 Date\_ 20210401  
 Time 10.20 h  
 INSTRUM spect  
 PROBHD Z115435\_0005 (  
 PULPROG zgpg30  
 TD 65536  
 SOLVENT CDC13  
 NS 512  
 DS 2  
 SWH 36231.883 Hz  
 FIDRES 1.105709 Hz  
 AQ 0.9043968 sec  
 RG 191.96  
 DW 13.800 usec  
 DE 18.00 usec  
 TE 300.2 K  
 D1 2.00000000 sec  
 D11 0.03000000 sec  
 TD0 1  
 SFO1 150.9178988 MHz  
 NUC1 13C  
 P0 3.73 usec  
 P1 11.20 usec  
 PLW1 28.00000000 W  
 SFO2 600.1324005 MHz  
 NUC2 1H  
 CPDPRG2 waltz16  
 FCPD2 70.00 usec  
 PLW2 18.00000000 W  
 PLW12 0.36368001 W  
 PLW13 0.18292999 W

F2 - Processing parameters  
 SI 32768  
 SF 150.9028100 MHz  
 WDW EM  
 SSB 0  
 LB 1.00 Hz  
 GB 0  
 PC 1.40

# Compound 4

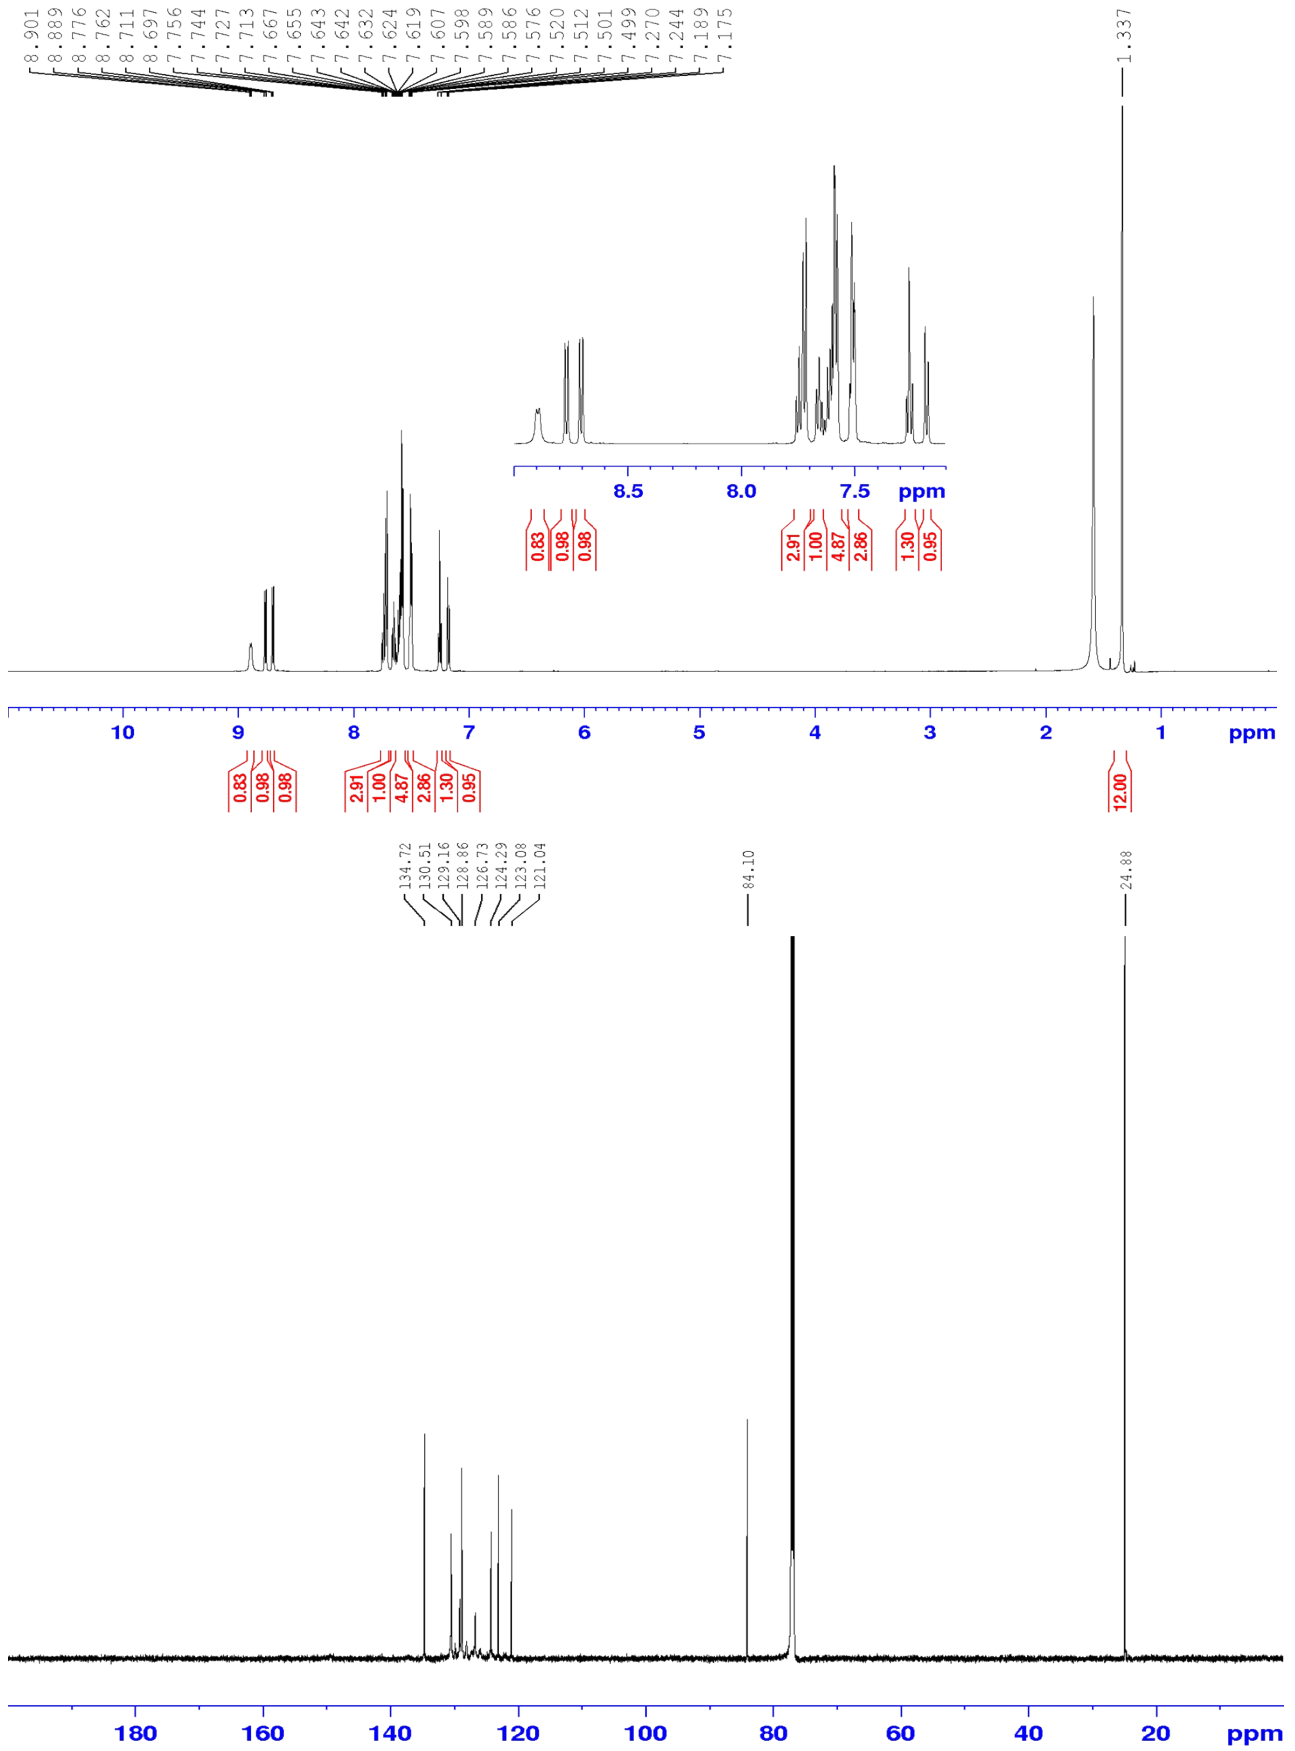

# Compound 2PyTPI

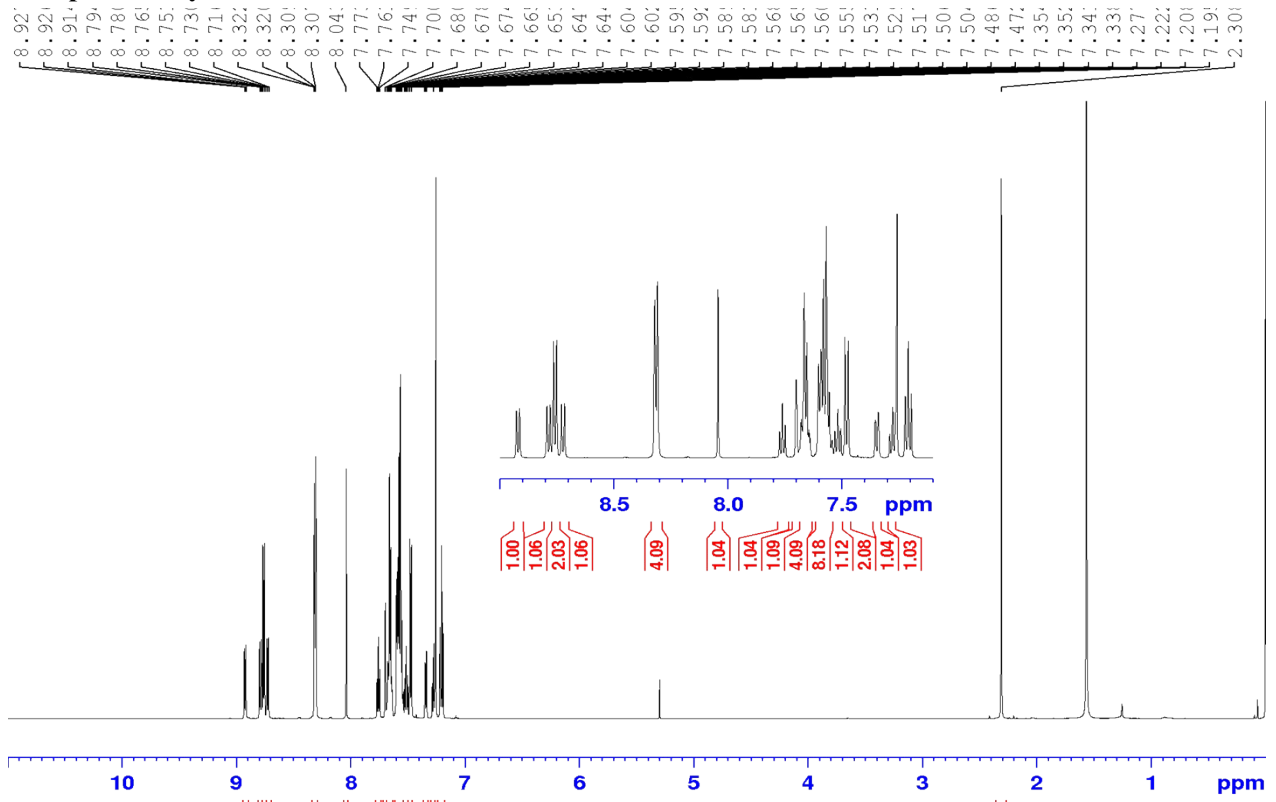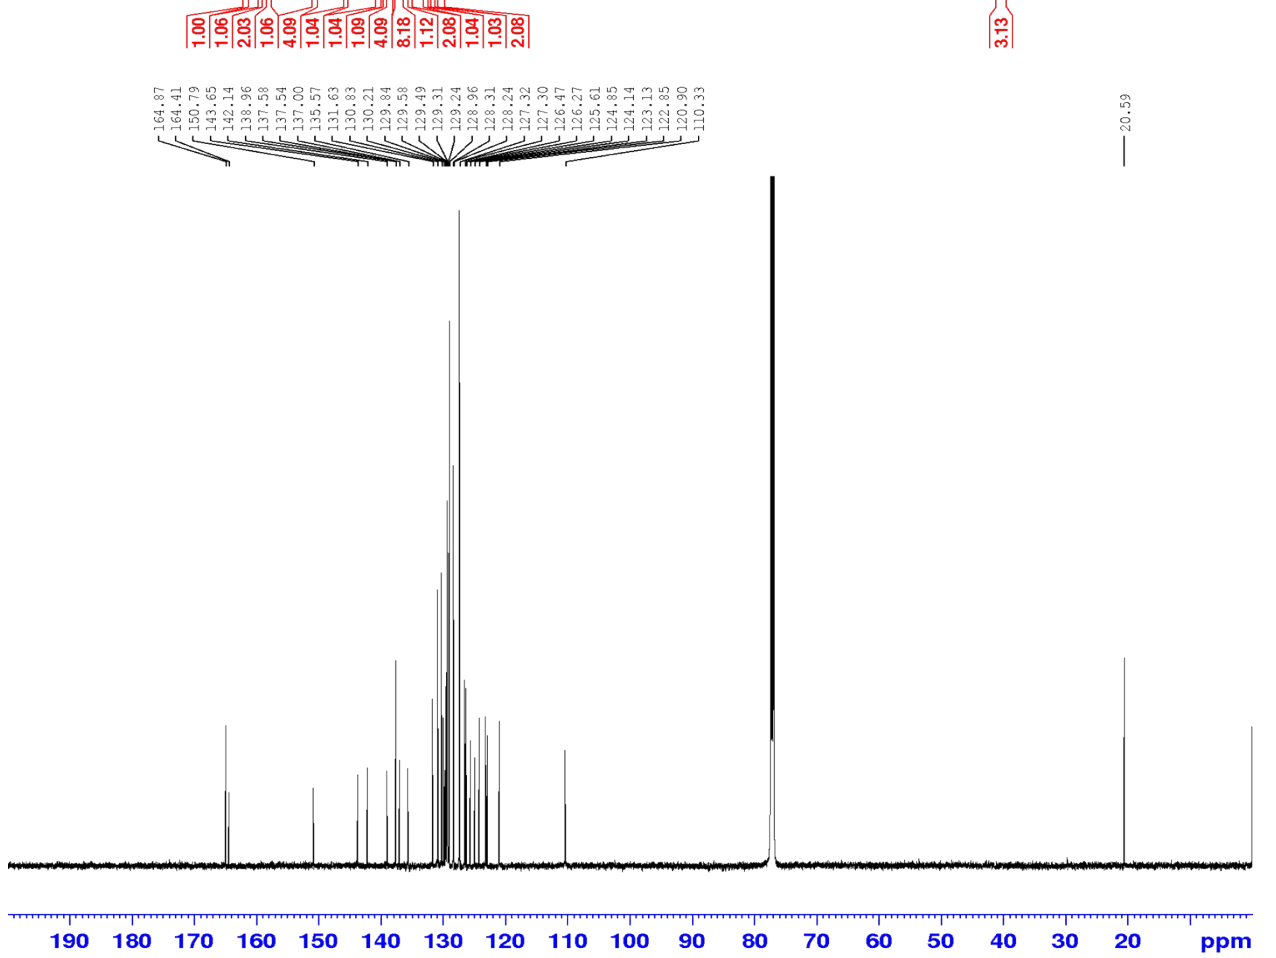

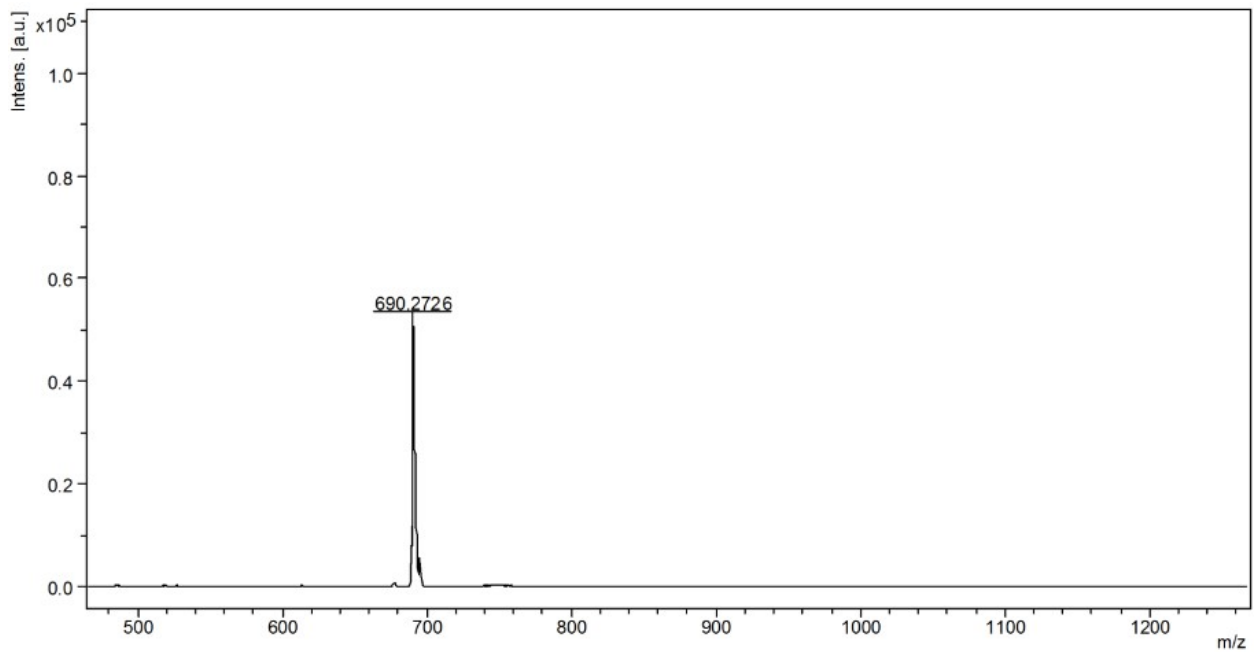

### Compound 2PyBPI

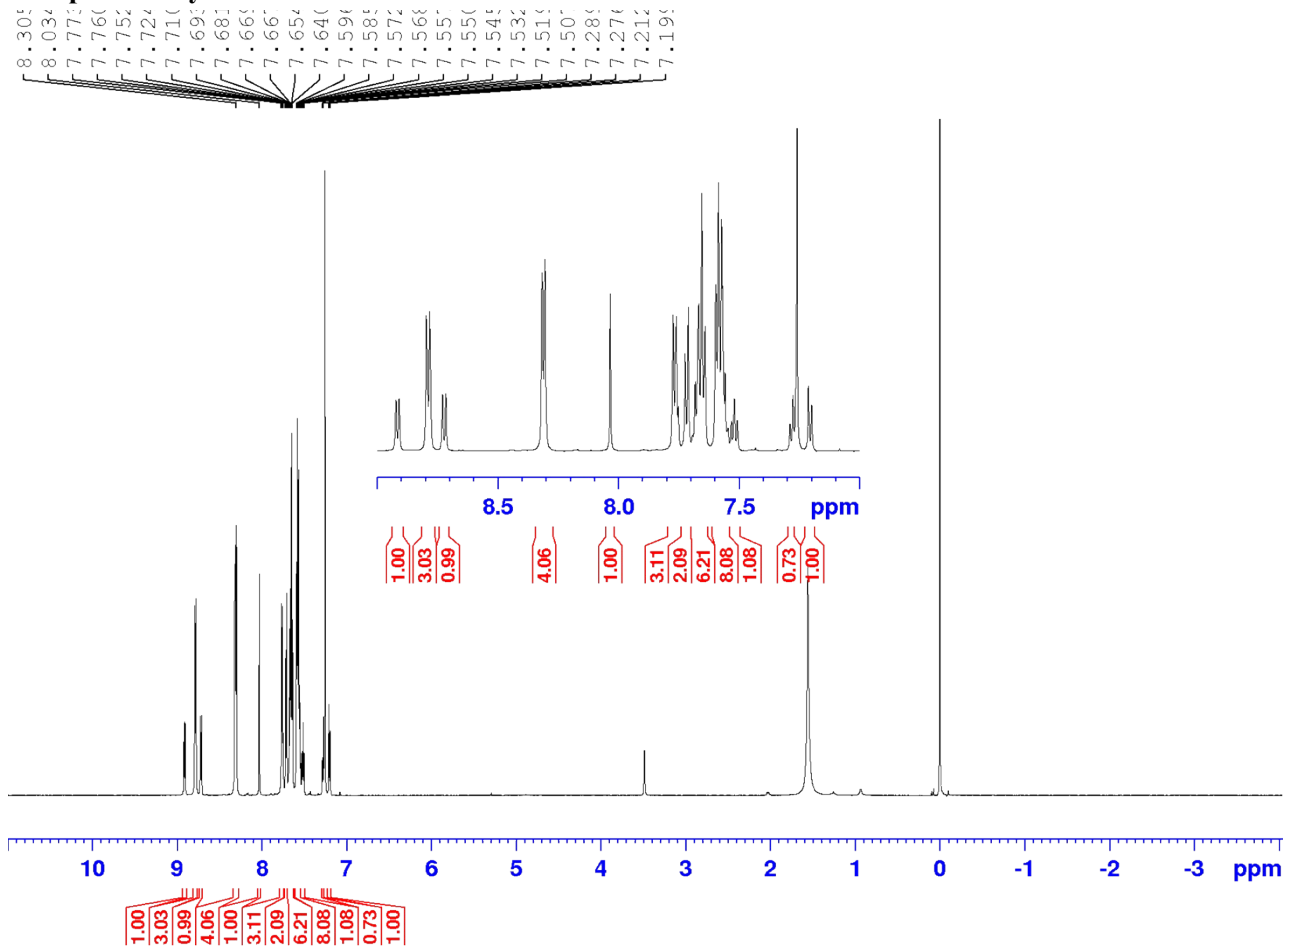

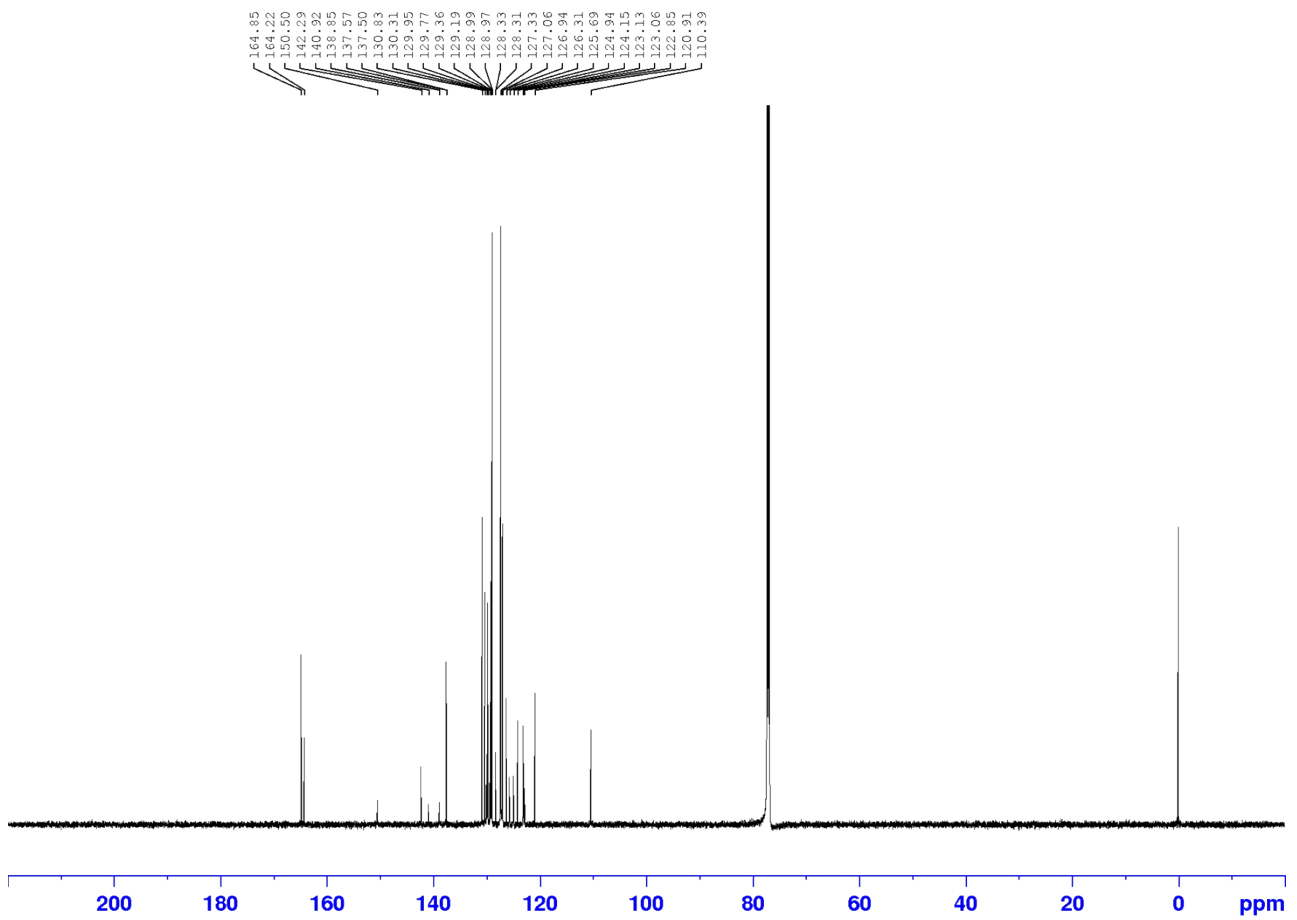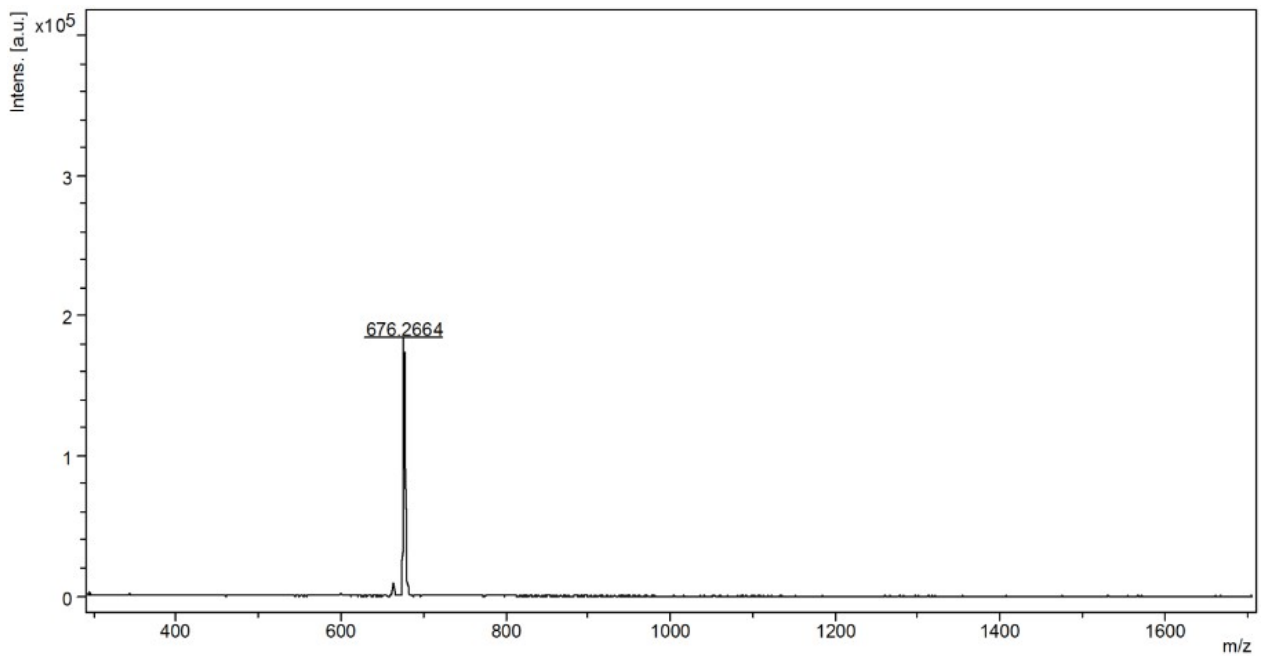

# Compound 4PyBPI

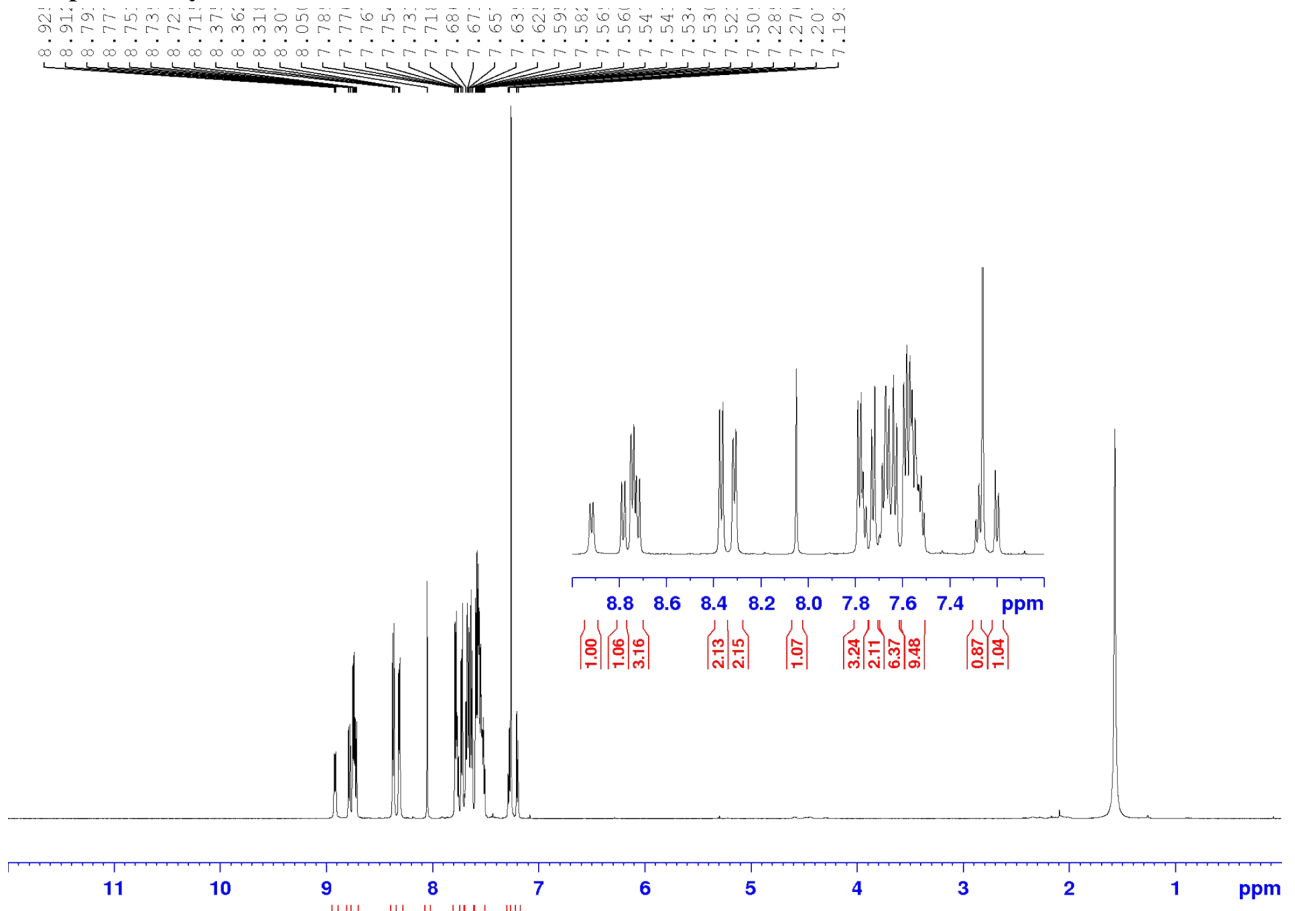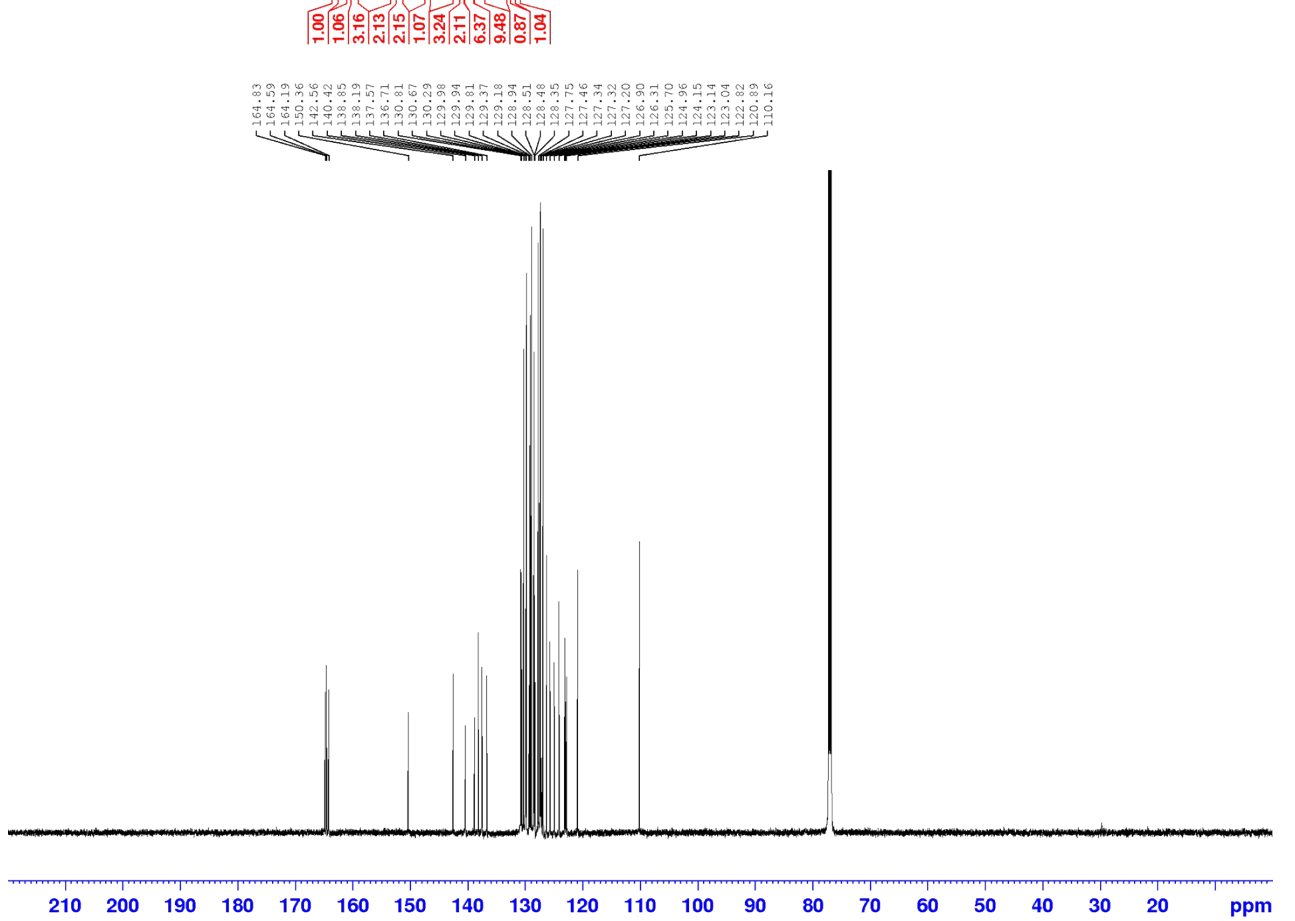

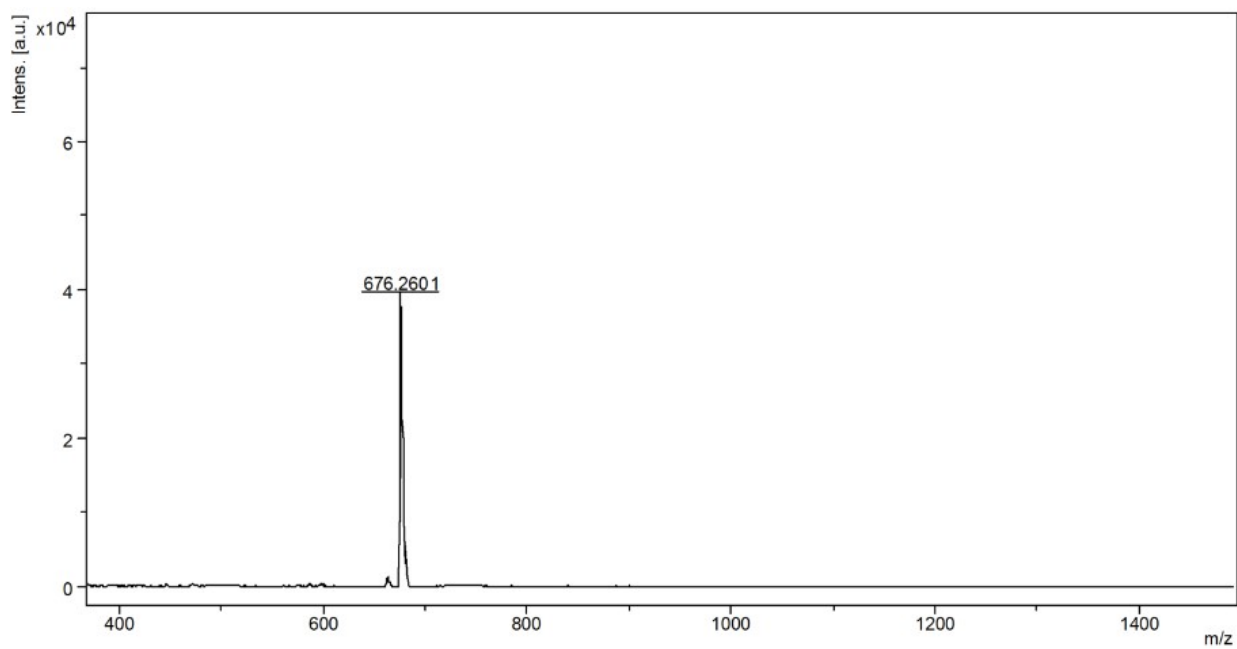

### Compound TrBPI

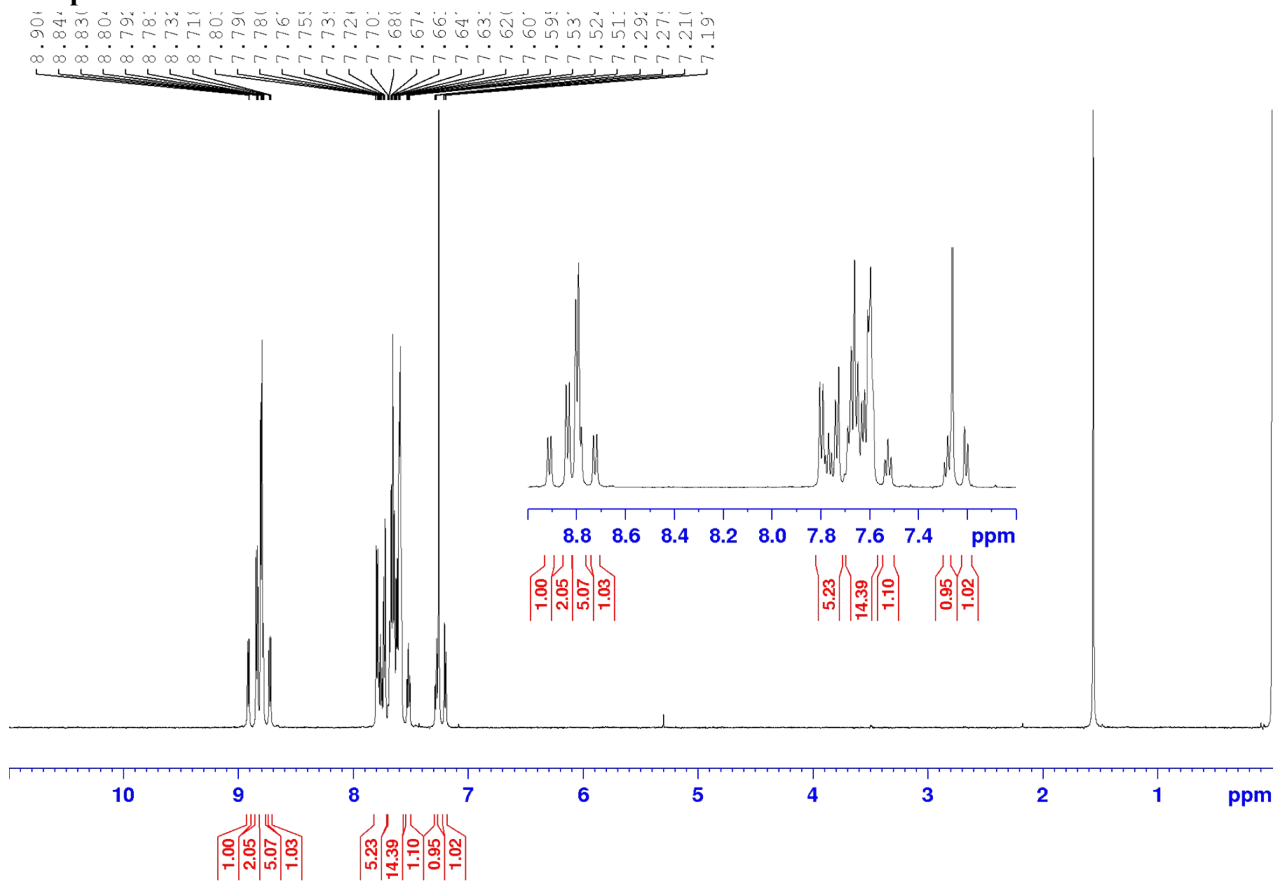

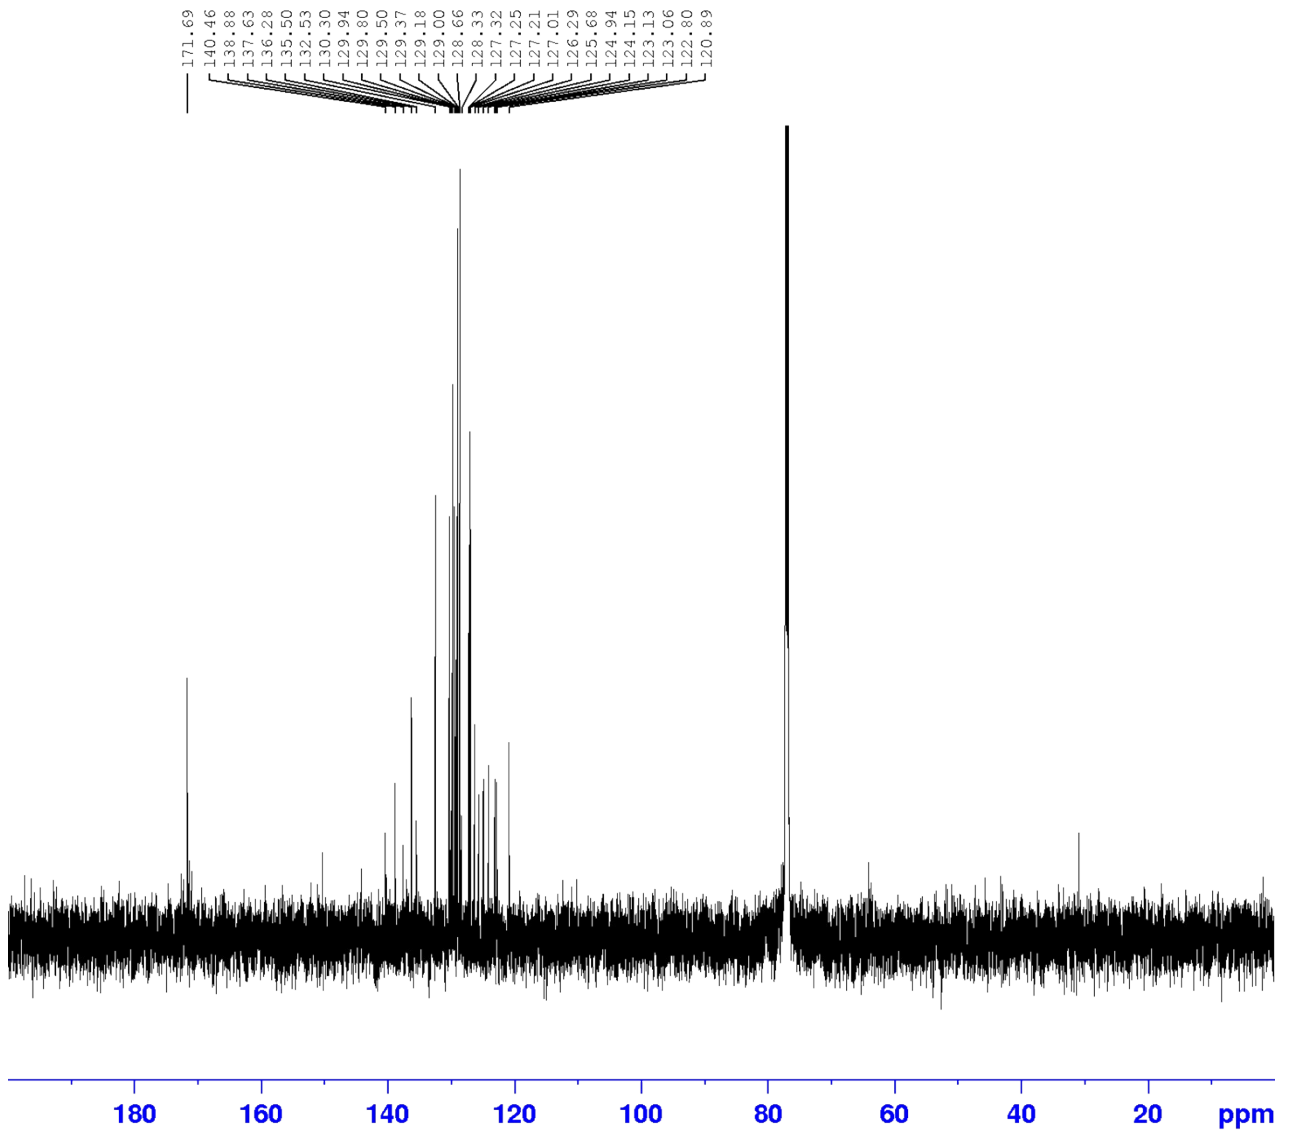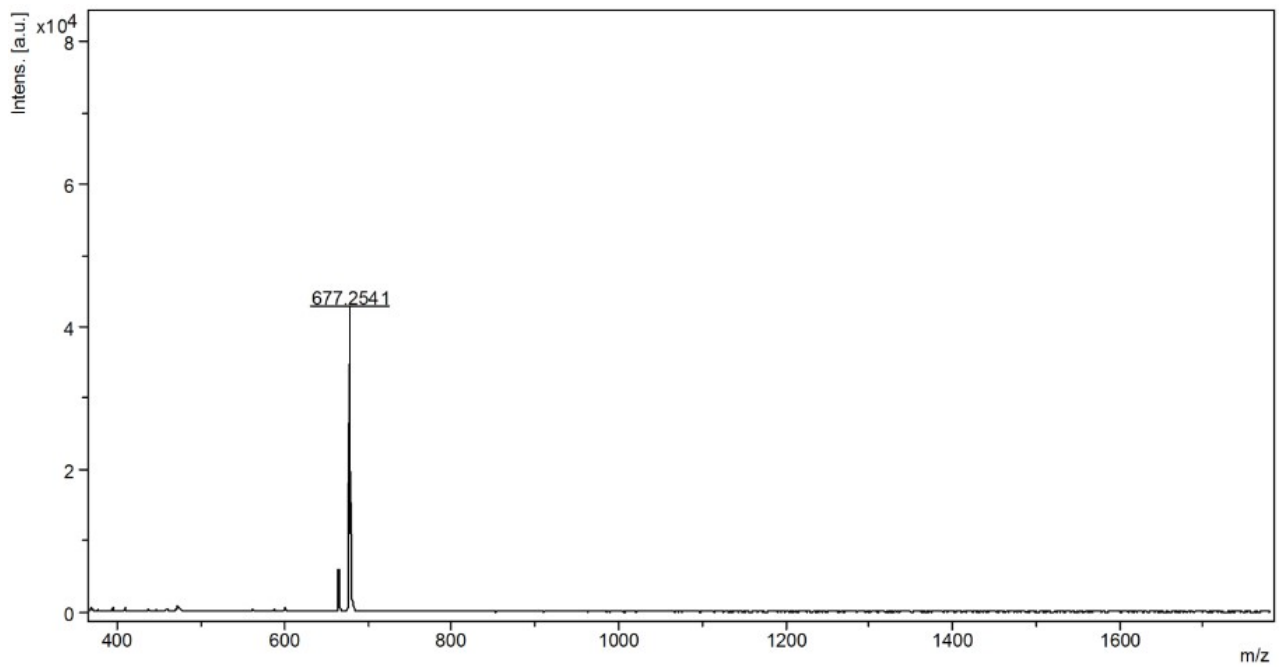

Supplement: d3tc02638h1.pdf [file d3tc02638h1.pdf]
